# Supplementary material for: Exosomes from adipose mesenchymal stem cells overexpressing Stanniocalcin-1 promote reendothelialization after carotid endarterium mechanical injury
Source: Research Square preprint supplement (doi:10.21203/rs.3.rs-250063/v1), 2021-02-24
Supplement: Supplementary file 1 [file fe6cf903386069fc1021e17c.docx]

Supporting information

Exosomes from adipose mesenchymal stem cells overexpressing Stanniocalcin-1 promote reendothelialization after carotid endarterium mechanical injury

Kun Liu1, Huihua Shi1, Zhiyou Peng1, Junchao Liu1, Xiaoyu Wu1*, Weimin Li1*, Xinwu Lu1*

1Department of Vascular Surgery, Shanghai Ninth People’s Hospital, Shanghai Jiao Tong University School of Medicine, Shanghai 200011, China

*Emails: Xiaoyu Wu, [wendaoliu1984@163.com](mailto:wendaoliu1984@163.com);Weimin Li, [liweimin71@hotmail.com](mailto:liweimin71@hotmail.com); Xinwu Lu, [luxinwu@shsmu.edu.cn](mailto:luxinwu@shsmu.edu.cn)

Supporting Figures


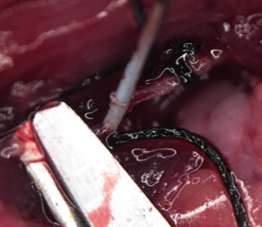


**Fig. S1** Mechanical injury to carotid endarterium. Insert with an 0.014" guide-wire into the left common carotid artery and push forward-back for 3 times.


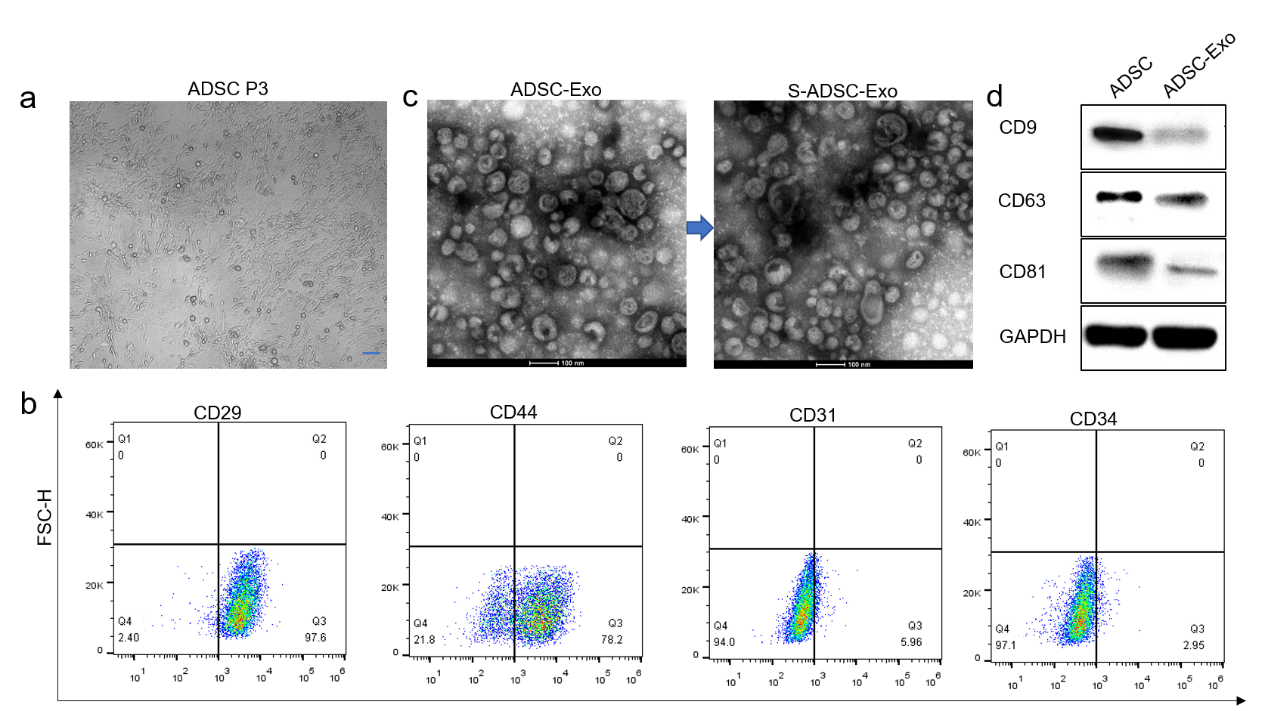


**Fig. S2** The characterization of ADSCs and Exosomes. **a** Representative image of ADSCs in passage 3. **b** Flow cytometry analysis of ADSCs showing strongly positive expression of CD29 and CD44, while negative expression of CD31 and CD34. **c** Electron microscopic image of exosomes. **d** Western blots showing expressions of CD9, CD63, and CD81 in exosomes. GAPDH, glyceraldehyde-3-phosphate dehydrogenase; ADSC-Exo, exosomes derived from ADSCs; S-ADSC-Exo, exosomes derived from ADSCs transfected with STC-1. Scale bar = 200 mm


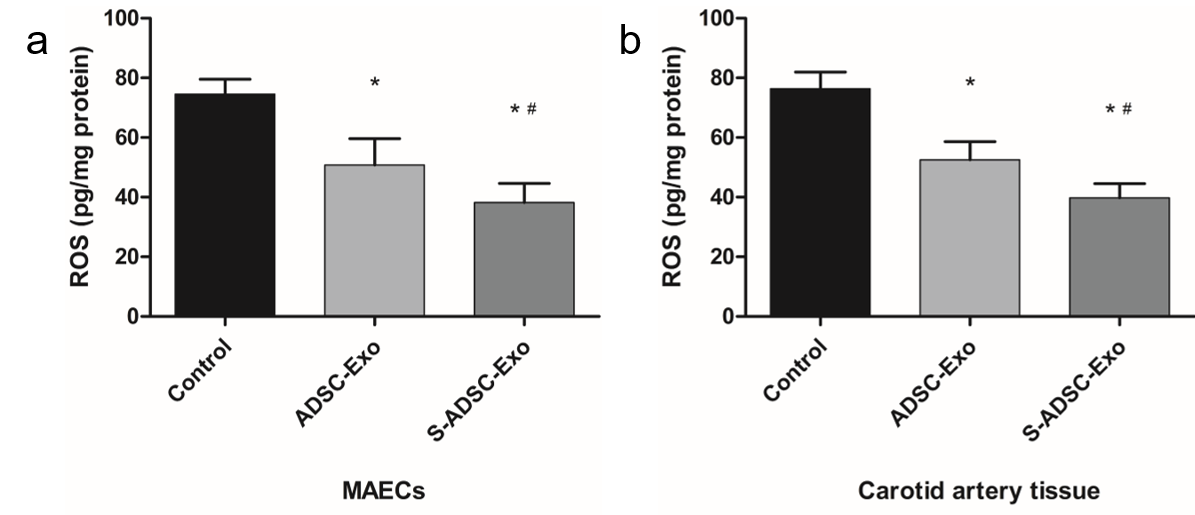


**Fig. S3** ROS content *in vitro* and *in vivo*. **a** ROS content in MAECs. **b** ROS content in carotid artery tissue. * *P*< .05, vs control. # *P*< .05, S-ADSC-Exo vs ADSC-Exo. ROS, reactive oxygen species; ADSC-Exo, exosomes derived from ADSCS; S-ADSC-Exo, exosomes derived from ADSCs transfected with STC-1.
